# Supplementary material
Source: PubMed Central journal article supplement (PMC4474356)
Supplement: am504614e_si_001.pdf [file am504614e_si_001.pdf]

Supporting Information

**The Impact of Topographic Cues, Heparin Hydrogel Microstructures and Encapsulated Fibroblasts on Phenotype of Primary Hepatocytes**

Jungmok You,<sup>1\*</sup> Vijay Krishna Raghunathan,<sup>2</sup> Kyung Jin Son,<sup>1</sup> Dipali Patel,<sup>1</sup>  
Amranul Haque,<sup>1</sup> Christopher J Murphy,<sup>2,3</sup> and Alexander Revzin<sup>1\*</sup>

<sup>1</sup>Department of Biomedical Engineering, University of California, Davis, CA 95616, USA.

<sup>2</sup>Department of Surgical & Radiological Sciences, School of Veterinary Medicine, University of California, Davis, CA 95616, USA.

<sup>3</sup>Department of Ophthalmology & Vision Science, School of Medicine, University of California, Davis, CA 95616, USA.

\* Corresponding author: Jungmok You and Alexander Revzin

Address: Department of Biomedical Engineering, University of California, Davis, CA 95616, USA

Tel.: +1-530-752-2383; Fax.: +1-530-754-5739

E-mail: [jmyou@ucdavis.edu](mailto:jmyou@ucdavis.edu) and [arevzin@ucdavis.edu](mailto:arevzin@ucdavis.edu)

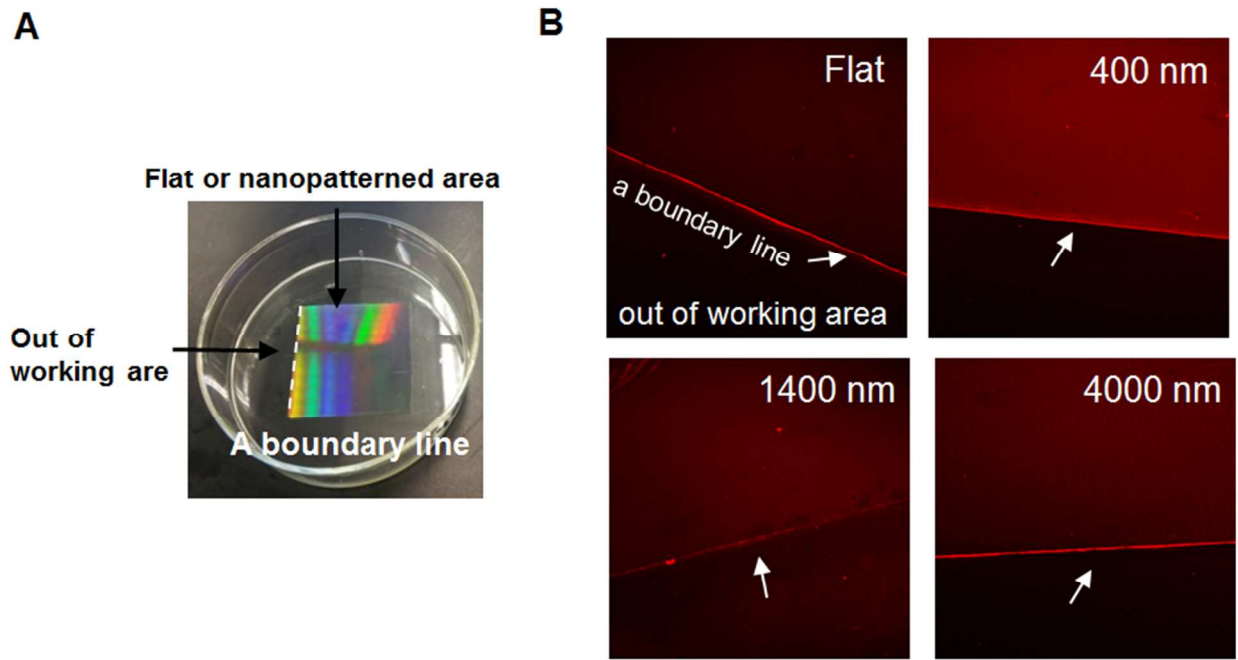

**Figure S1.** (A) Photograph image of NOA topographically patterned substrate on polystyrene. (B) Rhodamine fibronectin was physically adsorbed onto the flat and patterned surfaces.

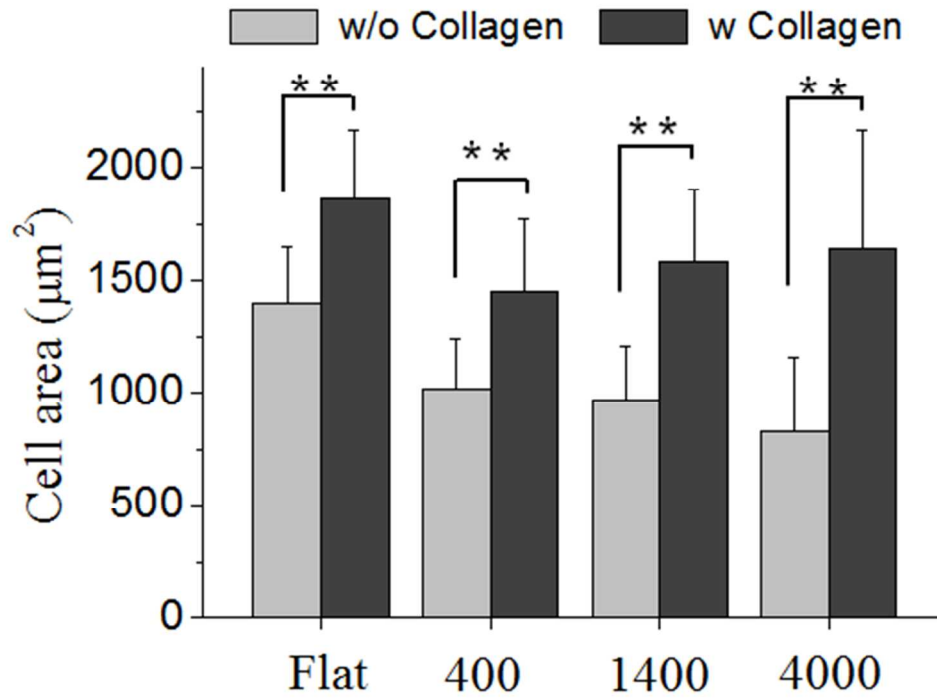

**Figure S2.** Cell area of hepatocytes cultured on flat and topographically patterned substrates with and without collagen I coating at day 1. In the absence of collagen I coating, cells had smaller surface areas when cultured on topographically patterned surfaces compared to planar controls ( $p \leq 0.05$ ) and the scale of the topographic features did not significantly affect cell size. Cells had larger surface areas for all substrates in the presence of collagen I. (\*\*  $0.001 < p \leq 0.01$ )

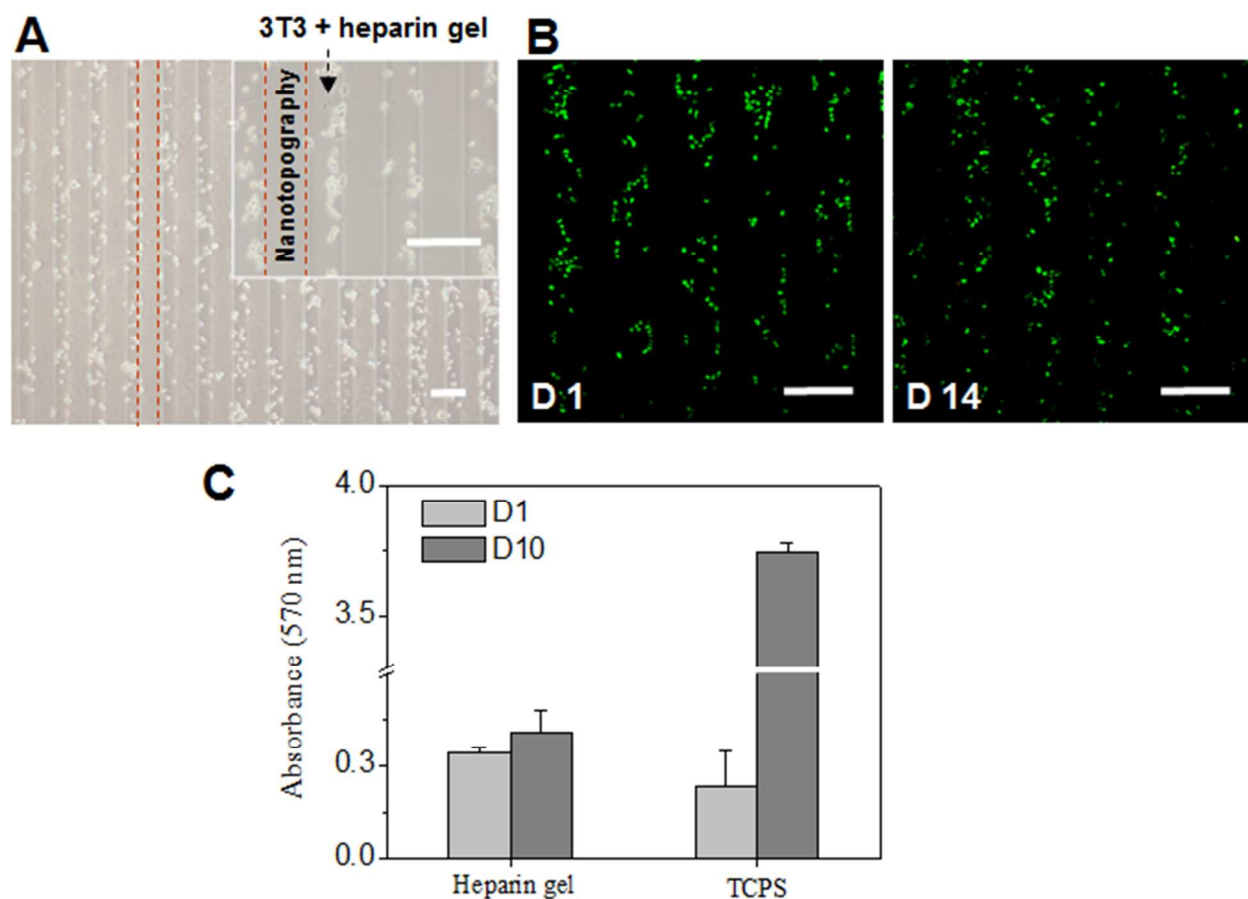

**Figure S3.** Characterization of the phenotypes of 3T3 fibroblasts encapsulated inside heparin gels. (A) Optical microscopic images of 3T3 fibroblasts encapsulated inside 100  $\mu\text{m}$  heparin hydrogel microstructure molded across a 400 nm pitch topographically patterned substrate. Inset: Magnified optical image. Scale bar = 200  $\mu\text{m}$ . (B) Alive/dead staining of 3T3 fibroblasts encapsulated in heparin gel microstructures at day 1 and 14. Scale bar = 200  $\mu\text{m}$ . (C) MTT assay of 3T3 fibroblasts encapsulated inside heparin hydrogel microstructures and cultured on TCPS at day 1 and 10. Proliferation of fibroblasts is restricted by embedding in the hydrogel.
